# Supplementary material for: Prevalence of diabetes recorded in mainland China using 2018 diagnostic criteria from the American Diabetes Association: national cross sectional study
Source: PubMed Central journal article supplement — BMJ. 2020 Apr 28;369:m997. doi: 10.1136/bmj.m997 (PMC7186854; doi:10.1136/bmj.m997), 2020-04-28
Supplement: liyo054529.ww.pdf [file liyo054529.ww.pdf]

## Supplementary appendix

**Figure 1. Flowchart depicting survey design.**

**Figure 2. Fasting plasma glucose, 2-hour plasma glucose, and HbA1c among the adults living in China by age group.**

**Figure 3. Choropleth maps of total diabetes and prediabetes prevalence in mainland China by province.**

**Figure 4. Prevalence of total diabetes diagnosed by the WHO criteria among the adults living in China stratified by age group from the 2007, 2013 and 2017 nationwide surveys.**

**Table 1. Tiers of prefectural-level Chinese cities.**

**Table 2. Age- and sex-standardized prevalence of newly diagnosed diabetes, impaired fasting glucose (IFG), impaired glucose tolerance (IGT) and risk factors among the adults living in China.**

**Table 3. Crude and adjusted prevalence of diabetes and prediabetes by province.**

**Table 4. Overview of the four nationally representative epidemiologic surveys of diabetes in mainland China.**

**Table 5. Prevalence of total diabetes, prediabetes diagnosed by the ADA criteria and obesity among the adults living in China stratified by age group according to the 2013 and 2017 nationwide surveys.**

**Appendix 1. Additional information on anthropometric and clinical methods and quality control.**

The authors have included this supplementary material to provide additional information to readers about their work.

**Figure 1. Flowchart depicting survey design**

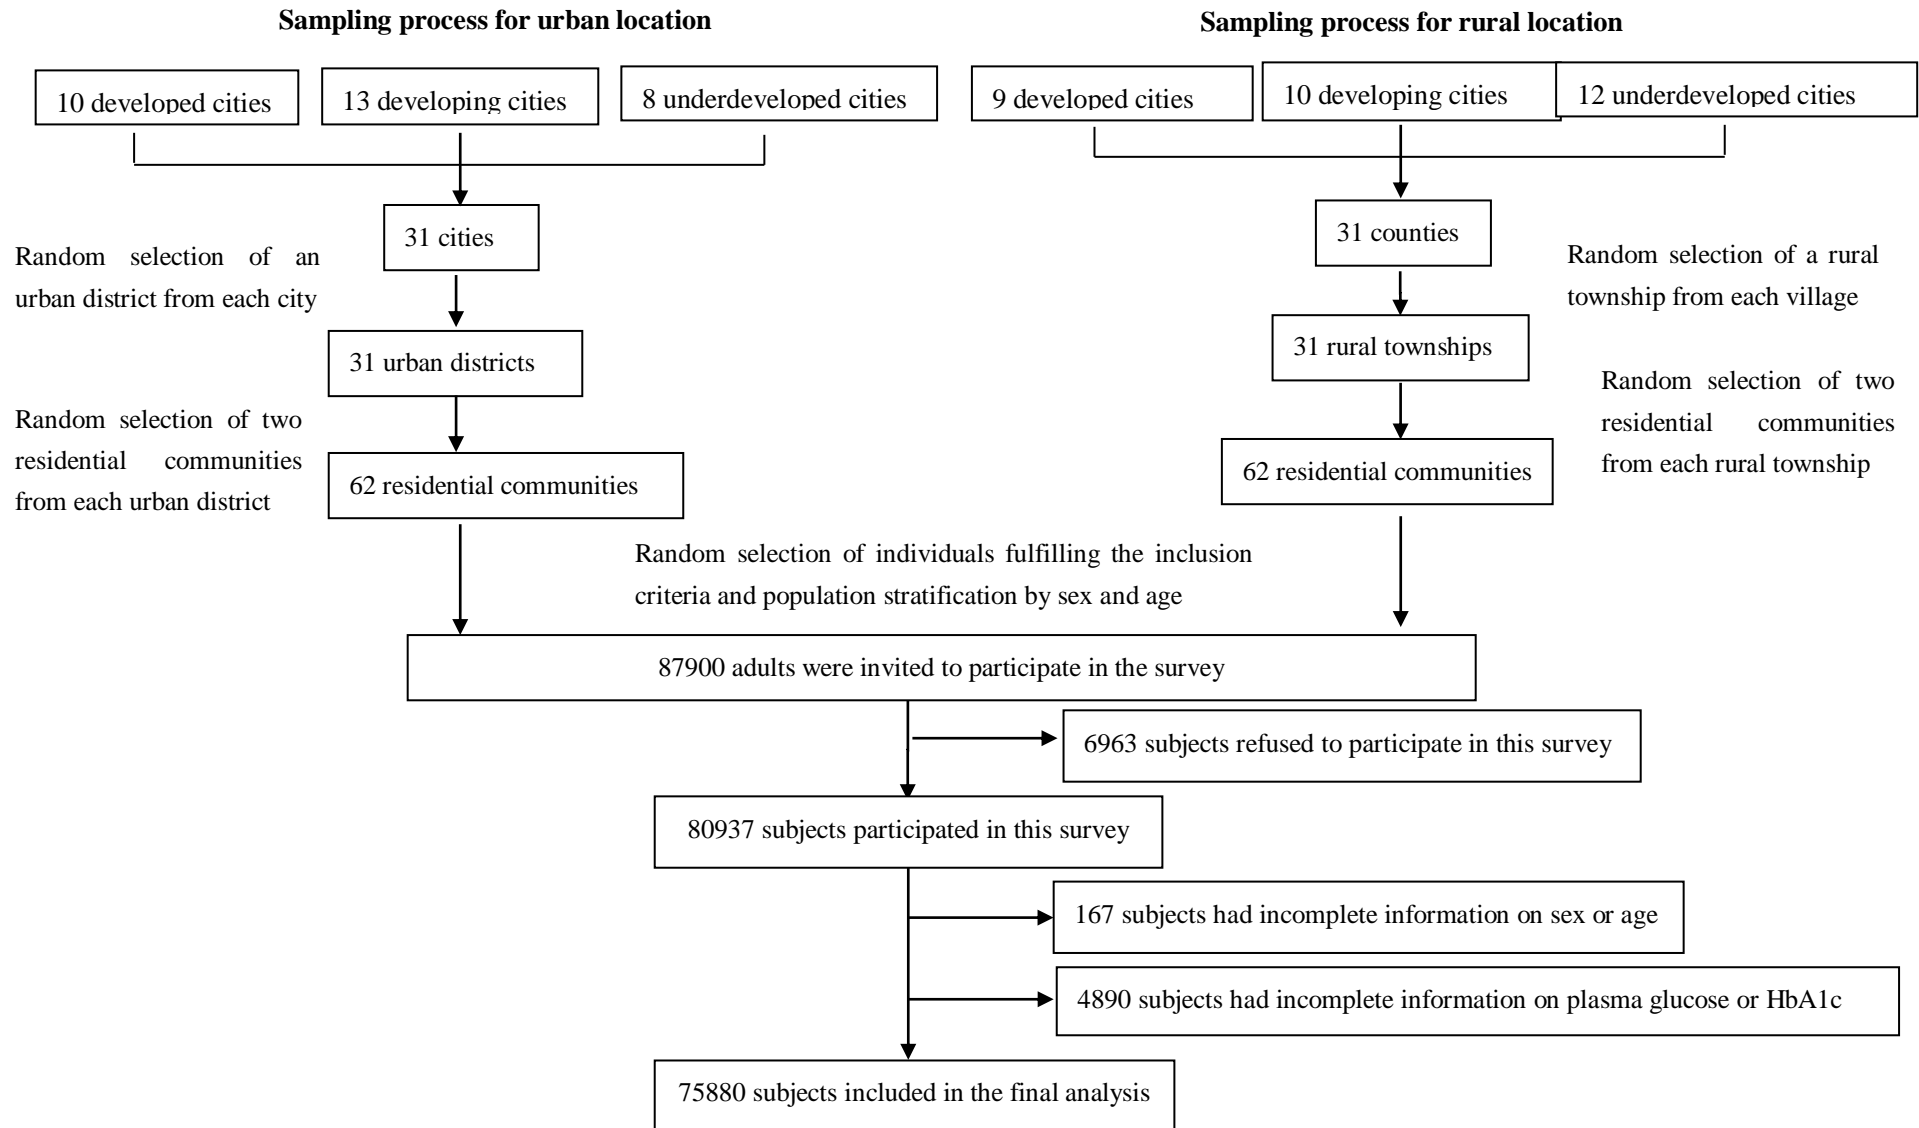

Supplementary Figure Legends: Sampling process for the urban population, at the first stage, one city was selected from each province in all 31 provinces of mainland China. Finally, 31 cities were selected and divided into 10 developed, 13 developing and 8 underdeveloped cities, based on gross domestic product per capita, concentration of commercial resources, the extent to which a city serves as a commercial hub, vitality of residents, diversity of lifestyle and future dynamism. At the second stage, one district was randomly selected from each city. At the third stage, two residential communities were randomly selected from the district. At the final stage, eligible individuals from the local resident registration list who met the inclusion criteria were randomly selected according to age-sex composition among the urban population from China's 2010 national census data. For the rural population, in the first-stage, 31 cities were selected and divided into 9 developed, 10 developing and 12 underdeveloped cities based on gross domestic product per capita, concentration of commercial resources, the extent to which a city serves as a commercial hub, vitality of residents, diversity of lifestyle and future dynamism. One city was selected from each province. At the second stage, one county was randomly selected from each city. At the third stage, one rural town was randomly selected from each county. At the fourth stage, at least two residential communities were randomly selected from the rural town. At the final stage, eligible individuals from the local resident registration list who met the inclusion criteria were randomly selected according to age-sex composition among rural populations from China's 2010 national census data.

Figure 2. Fasting plasma glucose, 2-hour plasma glucose, and HbA1c among the adults living in China by age group.

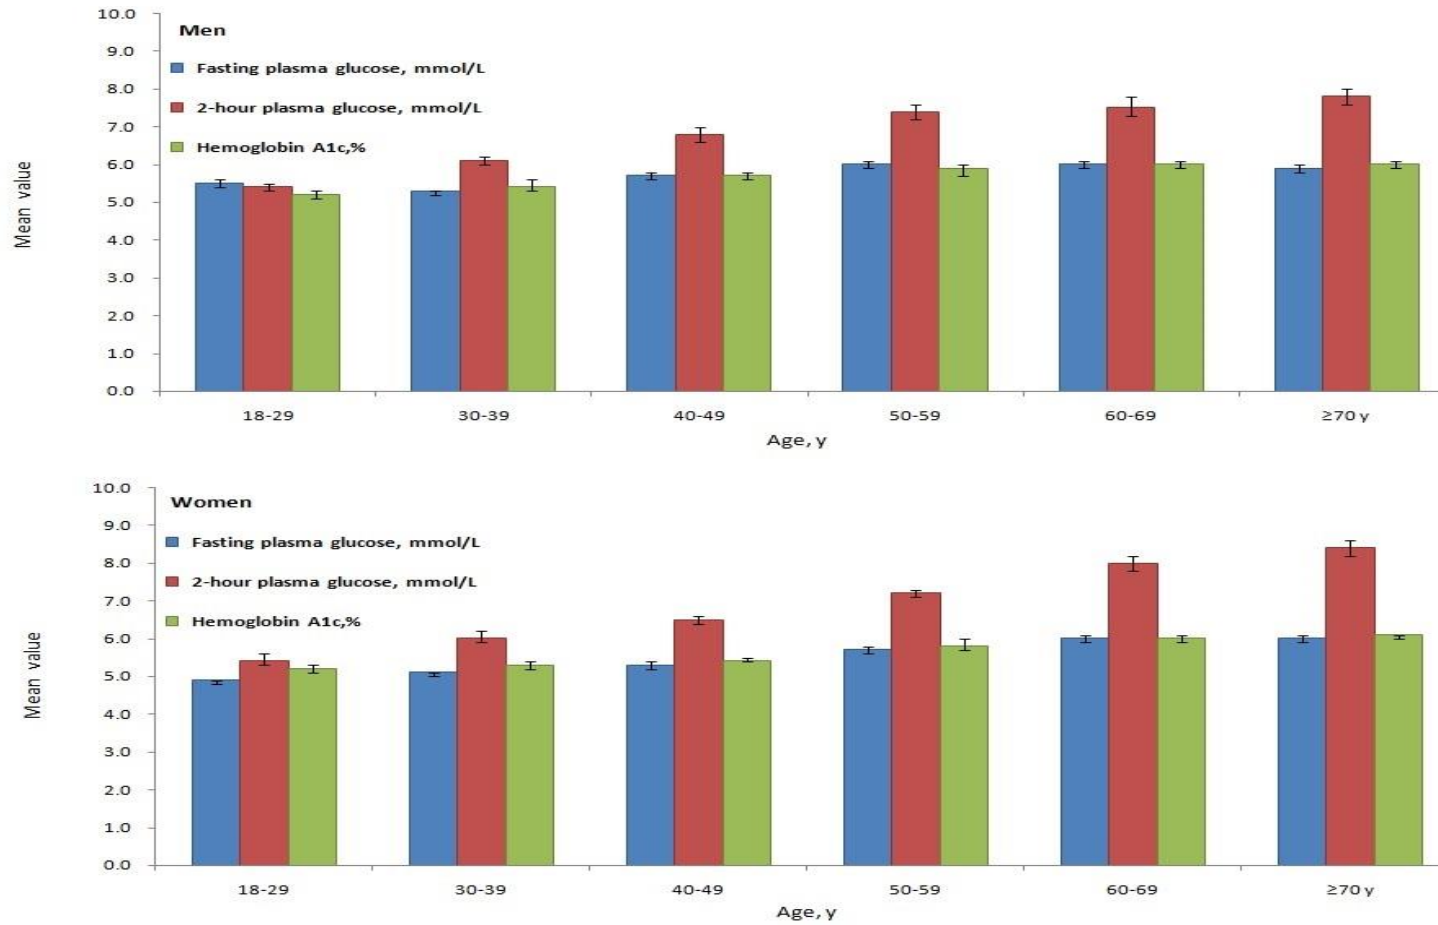

**Figure 3. Choropleth maps of total diabetes and prediabetes prevalence in mainland China by province.**

**A Diabetes prevalence**

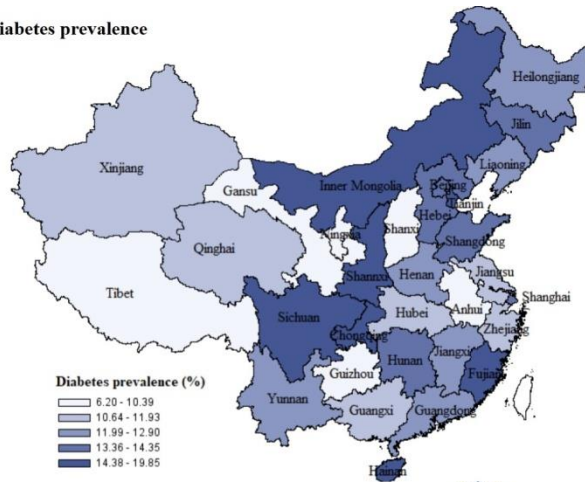

**B Prediabetes prevalence**

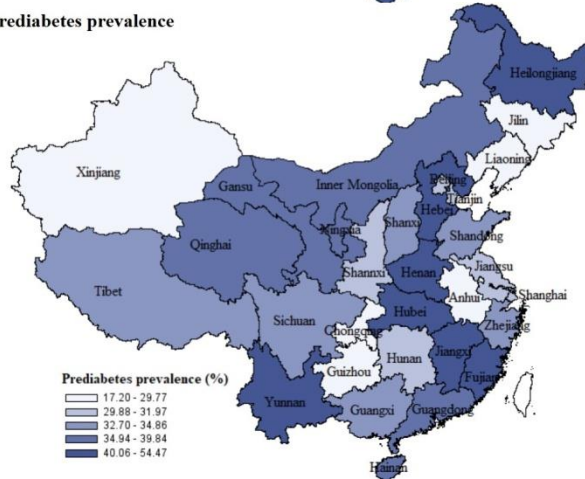

**Figure 4. Prevalence of total diabetes diagnosed by the WHO criteria among adults living in China stratified by age group from the 2007, 2013 and 2017 nationwide surveys.**

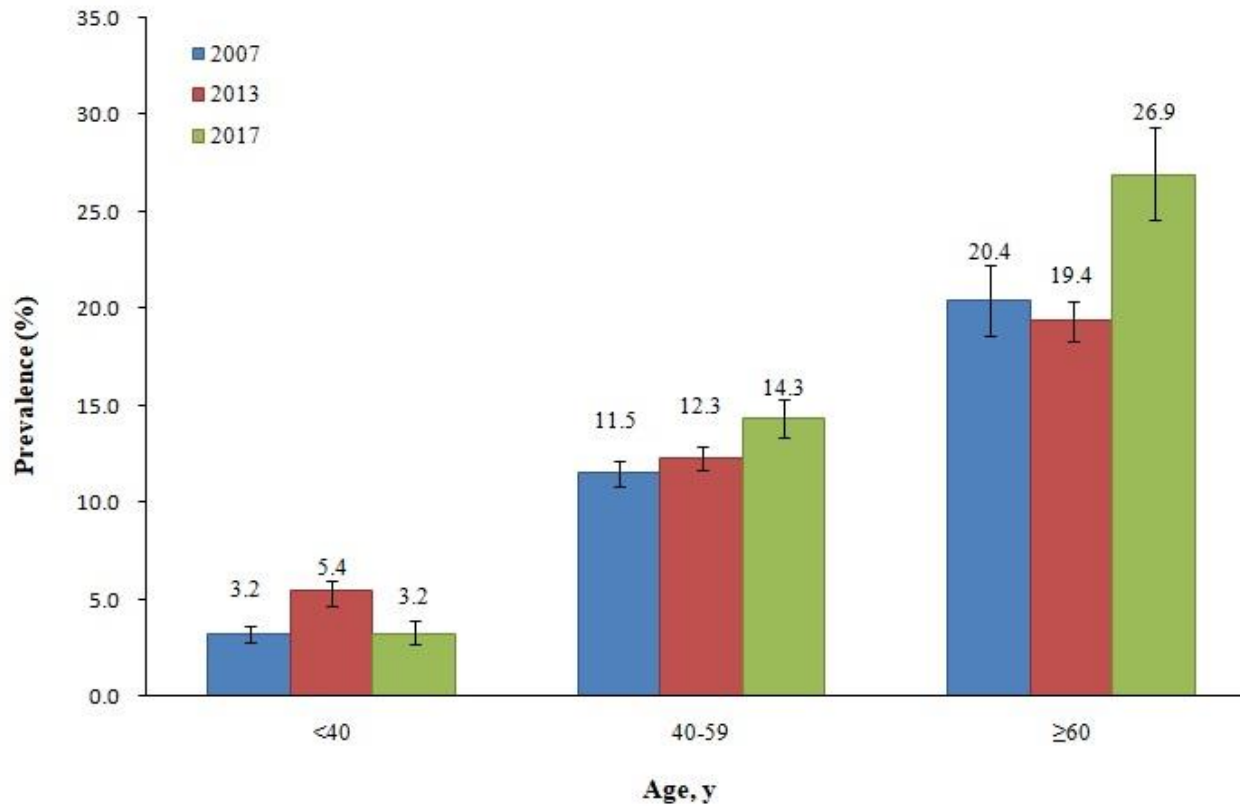

\* Data sources: For 2007 national survey PMID: 20335585. For 2013 national survey PMID: 28655017.

**Table 1. Tiers of Prefectural-level Chinese Cities\***

| Tier       | Cities                                                                                                                                                                                                                                                                                                                                                                                                                                                                                                                                                                                                                                                                      | Classification | Selected cities for urban location                                         | Selected cities for rural location                      |
|------------|-----------------------------------------------------------------------------------------------------------------------------------------------------------------------------------------------------------------------------------------------------------------------------------------------------------------------------------------------------------------------------------------------------------------------------------------------------------------------------------------------------------------------------------------------------------------------------------------------------------------------------------------------------------------------------|----------------|----------------------------------------------------------------------------|---------------------------------------------------------|
| Tier 1     | Beijing, Shanghai, Guangzhou, Shenzhen                                                                                                                                                                                                                                                                                                                                                                                                                                                                                                                                                                                                                                      | Developed      | Beijing, Shanghai, Guangzhou                                               | Beijing, Shanghai, Guangzhou                            |
| New Tier 1 | Chengdu, Hangzhou, Wuhan, Chongqing, Nanjing, Tianjin, Suzhou, Xi'an, Changsha, Shenyang, Qingdao, Zhengzhou, Dalian, Dongguan, Ningbo                                                                                                                                                                                                                                                                                                                                                                                                                                                                                                                                      | Developed      | Wuhan, Dalian, Xi'an, Chengdu, Tianjin, Hangzhou, Chongqing                | Dalian, Xi'an, Chengdu, Tianjin, Hangzhou, Chongqing    |
| Tier 2     | Xiamen, Fuzhou, Wuxi, Hefei, Kunming, Harbin, Ji'nan, Foshan, Changchun, Wenzhou, Shijiazhuang, Nanning, Changzhou, Quanzhou, Nanchang, Guiyang, Taiyuan, Yantai, Jiaxing, Nantong, Jinhua, Zhuhai, Huizhou, Xuzhou, Haikou, Ürümqi, Shaoxing, Zhongshan, Taizhou, Lanzhou                                                                                                                                                                                                                                                                                                                                                                                                  | Developing     | Hefei, Fuzhou, Guiyang, Haikou, Harbin, Xuzhou, Nanchang, Taiyuan, Kunming | Shijiazhuang, Taiyuan, Harbin, Fuzhou, Guiyang, Kunming |
| Tier 3     | Weifang, Baoding, Zhenjiang, Yangzhou, Guilin, Tangshan, Sanya, Huzhou, Hohhot, Langfang, Luoyang, Weihai, Yancheng, Linyi, Jiangmen, Shantou, Taizhou, Quzhou, Handan, Jining, Wuhu, Zibo, Yinchuan, Liuzhou, Mianyang, Zhanjiang, Anshan, Quzhou, Daqing, Yichang, Baotou, Xianyang, Qinhuangdao, Zhuzhou, Putian, Jilin, Huai'an, Zhaoqing, Ningde, Hengyang, Nanping, Lianyungang, Dandong, Lijiang, Jieyang, Yanbian Korean Autonomous Prefecture, Zhoushan, Jiujiang, Longyan, Cangzhou, Fushun, Xiangyang, Shangrao, Yingkou, Sanming, Handan, Lishui, Yueyang, Qingyuan, Jingzhou, Tai'an, Luzhou, Panjin, Dongying, Nanyang, Ma'anshan, Nanchong, Xining, Xiaogan, | Developing     | Hohhot, Cangzhou, Xining, Tai'an                                           | Hohhot, Tai'an                                          |

|        |                                                                                                                                                                                                                                                                                                                                                                                                                                                                                                                                                                                                                                                                                                                                                                                                                                                                                                                                                                                                     |                |                                                    |                                                                      |
|--------|-----------------------------------------------------------------------------------------------------------------------------------------------------------------------------------------------------------------------------------------------------------------------------------------------------------------------------------------------------------------------------------------------------------------------------------------------------------------------------------------------------------------------------------------------------------------------------------------------------------------------------------------------------------------------------------------------------------------------------------------------------------------------------------------------------------------------------------------------------------------------------------------------------------------------------------------------------------------------------------------------------|----------------|----------------------------------------------------|----------------------------------------------------------------------|
|        | Qiqihar                                                                                                                                                                                                                                                                                                                                                                                                                                                                                                                                                                                                                                                                                                                                                                                                                                                                                                                                                                                             |                |                                                    |                                                                      |
| Tier 4 | Leshan, Xiangtan, Zunyi, Suqian, Xinxiang, Xinyang, Chuzhou, Jinzhou, Chaohzhou, Huanggang, Kaifeng, Deyang, Dezhou, Meizhou, Erdos, Xingtai, Maoming, Dali Bai Autonomous Prefecture, Shaoguan, Shangqiu, Anqing, Huangshi, Liu'an, Yulin, Yichun, Beihai, Mudanjiang, Zhangjiakou, Wuzhou, Rizhao, Xianning, Changde, Jiamusi, Honghe Hani and Yi Autonomous Prefecture, Qiandongnan Miao and Dong Autonomous Prefecture, Yangjiang, Jinzhong, Weinan, Hulunbeier, Enshi Tujia and Miao Autonomous Prefecture, Heyuan, Chenzhou, Fuyang, Liaocheng, Datong, Baoji, Xuchang, Chifeng, Yuncheng, Anyang, Linfen, Xuancheng, Qujing, Xishuangbanna Dai Autonomous Prefecture, Shaoyang, Huludao, Pingdingshan, Liaoyang, Heze, Benxi, Huaihua, Siping, Yulin, Shiyan, Yibin, Binzhou, Fuzhou, Huainan, Zhoukou, Qiannan Buyi and Miao Autonomous Prefecture, Luzhou, Yuxi, Meishan, Tonghua, Suzhou, Zaozhuang, Neijiang, Zhuning, Ji'an, Tongliao, Jingdezhen, Fuxin, Yaan, Tieling, Chengde, Loudi | Underdeveloped | Xinxiang, Changde                                  | Kaifeng, Changde, Shiyan, Jingdezhen                                 |
| Tier 5 | Karamay, Changzhi, Yongzhou, Suihua, Bayingolin Mongol Autonomous Prefecture, Lhasa, Yunfu, Yiyang, Baise, Ziyang, Jinmen, Songyuan, Liangshan Yi Autonomous Prefecture, Dazhou, Kazak Autonomous Prefecture of Ili, Guang'an, Zigong, Hanzhong, Chaoyang, Luohe, Qinzhou, Guigang, Anshun, Ezhou, Guangyuan, Hechi, Yingtan, Ulanqab, Tongling, Hui Autonomous Prefecture of Changji, Hengshui,                                                                                                                                                                                                                                                                                                                                                                                                                                                                                                                                                                                                    | Underdeveloped | Longnan, Chongzuo, Liaoyuan, Guyuan, Lhasa, Turpan | Liaoyuan, Chongzuo, Longnan, Haidong, Guyuan, Turpan, Lhasa, Danzhou |



|                                                                                                                                                                                                                                                                                                                                                                                                                                                                                                                                                                                                                                                                                                                                                                                                                                                                                                                                                                                                                                                                                                                                                                                                                                                                                                                                                                                                                                                                  |  |  |  |
|------------------------------------------------------------------------------------------------------------------------------------------------------------------------------------------------------------------------------------------------------------------------------------------------------------------------------------------------------------------------------------------------------------------------------------------------------------------------------------------------------------------------------------------------------------------------------------------------------------------------------------------------------------------------------------------------------------------------------------------------------------------------------------------------------------------------------------------------------------------------------------------------------------------------------------------------------------------------------------------------------------------------------------------------------------------------------------------------------------------------------------------------------------------------------------------------------------------------------------------------------------------------------------------------------------------------------------------------------------------------------------------------------------------------------------------------------------------|--|--|--|
| <p>Qiandongnan Buyi and Miao Autonomous Prefecture, Puyang, Xilin Gol League, Bayan Nur, Jixi, Hezhou, Fangchenggang, Hinggan League, Baishan, Sanmenxia, Xinzhou, Shuangyashan, Yi Autonomous Prefecture of Chuxiong, Xinyu, Laibin, Huaibei, Haozhou, Xiangxi Tujia and Miao Autonomous Prefecture, Lvliang, Panzhihua, Jincheng, Yan'an, Bijie, Zhangjiajie, Jiuquan, Chongzuo, Pingxiang, Wwuhai, Yichun, Liupanshui, Suizhou, Dehong Dai and Jingpo Autonomous Prefecture, Chizhou, Heihe, Hami, Wenshan Zhang and Miao Autonomous Prefecture, Aba Tibetan and Qiang Autonomous Prefecture, Tianshui, Liaoyuan, Zhangye, Tongren, Hebi, Danzhou, Baoshan, Ankang, Baicheng, Bazhong, Puer, Hegang, Laiwu, Yangquan, Garze Tibetan Autonomous Prefecture, Jiayuguan, Baiyin, Lincang, Shangluo, Akesu Prefecture, Haixi Mongolian and Tibetan Autonomous Prefecture, Daxinganling region, Qitaihe, Suzhou, Tongchuan, Dingxi, Diqing Tibetan Autonomous Prefecture, Xigaze, Qingyang, Zhaotong, Kashi Prefecture, Nujiang of the Lisu Autonomous Prefecture, Haidong, Altay Prefecture, Pingliang, Shizuishan, Wuwei, Alxa League, Tacheng Prefecture, Linzhi, Jinchang, Wuzhong, Zhongwei, Longnan, Shannan, Turpan, Bortala Mongol Autonomous Prefecture, Linxia Hui Autonomous Prefecture, Guyuan, Gannan Tibetan Autonomous Prefecture, Changdu, Ngari Prefecture, Hainan Tibetan Autonomous Prefecture, Hotan Prefecture, Kizilsu Kirgiz Autonomous</p> |  |  |  |
|------------------------------------------------------------------------------------------------------------------------------------------------------------------------------------------------------------------------------------------------------------------------------------------------------------------------------------------------------------------------------------------------------------------------------------------------------------------------------------------------------------------------------------------------------------------------------------------------------------------------------------------------------------------------------------------------------------------------------------------------------------------------------------------------------------------------------------------------------------------------------------------------------------------------------------------------------------------------------------------------------------------------------------------------------------------------------------------------------------------------------------------------------------------------------------------------------------------------------------------------------------------------------------------------------------------------------------------------------------------------------------------------------------------------------------------------------------------|--|--|--|

|  |                                                                                                                                                                                              |  |  |  |
|--|----------------------------------------------------------------------------------------------------------------------------------------------------------------------------------------------|--|--|--|
|  | Prefecture, Haibei Tibetan Autonomous Prefecture, Nagqu Prefecture, Yushu Tibetan Autonomous Prefecture, Huangnan Tibetan Autonomous Prefecture, Golog Tibetan Autonomous Prefecture, Sansha |  |  |  |
|--|----------------------------------------------------------------------------------------------------------------------------------------------------------------------------------------------|--|--|--|

\*According to tiers of Chinese cities published by Yicai Chinese Cities Research Institution <sup>1</sup>, the ranking assessed all Chinese cities drawing from data on the following dimensions: gross domestic product per capita, concentration of commercial resources, the extent to which a city serves as a commercial hub, vitality of residents, diversity of lifestyle, and future dynamism. The list above shows the classification, which includes 338 cities ranked on 6 tiers: developed (tier 1, new tier 1), developing (tier 2, tier 3), and underdeveloped (tier 4, tier 5).

Reference:

[1]. Tiers of Prefecture-level Chinese Cities. Yicai Chinese Cities Research Institution. <https://baike.baidu.com/item/中国城市新分级名单/12702007?fr=Aladdin> [in Chinese]. Accessed by 20 September, 2019.

**Table 2. Age- and sex-standardized prevalence of newly diagnosed diabetes, impaired fasting glucose (IFG), impaired glucose tolerance (IGT) and risk factors among the adults living in China.**

|                  | Estimated prevalence, % (95% CI)      |                  |                  |
|------------------|---------------------------------------|------------------|------------------|
|                  | Newly diagnosed diabetes <sup>a</sup> | IFG <sup>b</sup> | IGT <sup>b</sup> |
| Overall          | 6.8 (6.1-7.4)                         | 2.4 (2.0-2.9)    | 11.5 (10.5-12.7) |
| Sex              |                                       |                  |                  |
| Men              | 7.4 (6.6-8.1)                         | 3.0 (2.5-3.6)    | 11.2 (10.1-12.4) |
| Women            | 6.1 (5.5-6.8)                         | 1.8 (1.4-2.2)    | 11.9 (10.7-13.2) |
| p for difference | 0.0001                                | <0.0001          | 0.14             |
| Urbanization     |                                       |                  |                  |
| Urban            | 6.6 (5.8-7.4)                         | 2.1 (1.6-2.7)    | 12.2 (10.5-14.1) |
| Rural            | 6.9 (5.9-8.1)                         | 2.7 (1.9-3.7)    | 10.8 (9.4-12.5)  |
| p for difference | 0.13                                  | 0.18             | 0.8              |
| Age group        |                                       |                  |                  |
| 18-29            | 1.2 (1.0-1.6)                         | 0.9 (0.6-1.1)    | 4.1 (3.2-5.3)    |
| 30-39            | 3.7 (3.2-4.3)                         | 1.7 (1.5-2.1)    | 8.7 (7.4-10.2)   |
| 40-49            | 7.3 (6.5-8.3)                         | 2.9 (2.3-3.6)    | 13.2 (11.8-14.9) |
| 50-59            | 10.6 (9.5-11.7)                       | 3.9 (3.2-4.7)    | 15.9 (14.6-17.3) |
| 60-69            | 13.9 (12.0-16.1)                      | 3.8 (2.8-5.1)    | 19.1 (17.4-21.0) |
| ≥70              | 15.4 (14.0-16.9)                      | 3.1 (2.3-4.2)    | 21.5 (20.0-23.0) |
| p for trend      | <0.0001                               | <0.0001          | 0.0006           |
| Ethnicity        |                                       |                  |                  |
| Han              | 6.7 (6.1-7.4)                         | 2.4 (2.0-2.9)    | 11.4 (10.4-12.6) |
| Tibetan          | 5.0 (3.6-6.9)                         | 0.6 (0.4-0.8)    | 8.5 (5.7-12.3)   |

|                       |                |               |                  |
|-----------------------|----------------|---------------|------------------|
| Uyghur                | 6.9 (5.5-8.6)  | 1.3 (0.7-2.5) | 7.0 (5.8-8.4)    |
| Hui                   | 4.4 (4.0-4.9)  | 3.1 (2.6-3.6) | 5.9 (4.7-7.4)    |
| Zhuang                | 7.6 (6.7-8.6)  | 2.5 (1.7-3.6) | 17.4 (14.1-21.4) |
| p for difference      | <0.0001        | 0.15          | <0.0001          |
| Region                |                |               |                  |
| South                 | 7.0 (6.9-7.1)  | 1.5 (0.8-3.0) | 16.1 (11.8-21.6) |
| North                 | 7.6 (7.2-8.0)  | 2.7 (2.4-3.1) | 9.9 (8.1-12.1)   |
| East                  | 6.3 (5.2-7.6)  | 2.3 (1.5-3.3) | 11.1 (9.6-12.9)  |
| Central               | 5.6 (4.4-7.1)  | 1.4 (0.9-2.1) | 9.0 (8.0-10.1)   |
| Southwest             | 8.6 (6.2-11.7) | 4.0 (2.5-6.3) | 12.8 (10.9-15.0) |
| Northwest             | 6.4 (5.7-7.3)  | 1.8 (0.9-3.5) | 11.4 (10.0-12.9) |
| Northeast             | 6.2 (5.3-7.1)  | 3.2 (2.5-4.1) | 12.1 (10.2-14.5) |
| p for difference      | 0.01           | 0.009         | 0.02             |
| Income per year (¥)   |                |               |                  |
| ≤30000 Chinese Yuan   | 7.0 (6.3-7.8)  | 2.6 (2.0-3.3) | 11.6 (10.3-13.1) |
| >30000 Chinese Yuan   | 6.5 (5.9-7.3)  | 2.2 (1.8-2.7) | 11.6 (10.6-12.6) |
| p for difference      | 0.0004         | 0.03          | 0.002            |
| Education             |                |               |                  |
| Less than high school | 7.1 (6.3-7.9)  | 2.8 (2.2-3.6) | 11.3 (10.3-12.3) |
| High school and above | 6.6 (5.9-7.3)  | 2.0 (1.6-2.5) | 11.8 (10.6-13.1) |
| p for difference      | <0.0001        | 0.0001        | <0.0001          |
| Current cigarette     |                |               |                  |

|                               |                  |               |                  |
|-------------------------------|------------------|---------------|------------------|
| smoking                       |                  |               |                  |
| Current nonsmoker             | 6.7 (6.1-7.4)    | 2.3 (1.9-2.8) | 11.7 (10.5-12.9) |
| Occasional smoker             | 7.3 (6.1-8.7)    | 2.2 (1.6-3.0) | 9.8 (8.2-11.7)   |
| Regular smoker                | 6.9 (5.8-8.2)    | 2.4 (1.9-3.1) | 9.9 (8.6-11.5)   |
| p for trend                   | 0.77             | 0.6           | 0.007            |
| Family history of diabetes    |                  |               |                  |
| Yes                           | 8.1 (7.1-9.2)    | 2.1 (1.7-2.5) | 11.8 (10.6-13.0) |
| No                            | 6.5 (5.9-7.1)    | 2.4 (2.0-2.9) | 11.4 (10.3-12.6) |
| p for difference              | 0.04             | 0.03          | 0.45             |
| Body mass index               |                  |               |                  |
| <25                           | 5.0 (4.5-5.7)    | 2.1 (1.7-2.6) | 9.8 (8.6-11.0)   |
| 25 $\leq$ to $<$ 30           | 8.3 (7.5-9.0)    | 2.8 (2.3-3.5) | 13.9 (12.7-15.3) |
| $\geq$ 30                     | 13.2 (12.0-14.4) | 2.9 (2.3-3.6) | 17.4 (15.3-19.9) |
| p for trend                   | 0.02             | 0.002         | <0.0001          |
| Waist circumference (cm)      |                  |               |                  |
| Men $\geq$ 90 <del>cm</del>   | 8.7 (8.0-9.5)    | 2.7 (2.2-3.3) | 14.0 (12.6-15.5) |
| women $\geq$ 80 <del>cm</del> |                  |               |                  |
| Men $<$ 90 <del>cm</del>      | 4.8 (4.2-5.5)    | 2.2 (1.7-2.7) | 9.6 (8.5-11.0)   |
| women $<$ 80 <del>cm</del>    |                  |               |                  |
| p for difference              | <0.0001          | 0.0003        | <0.0001          |

<sup>a</sup> Newly diagnosed diabetes and prediabetes were defined by the 2018 ADA diagnostic criteria.

<sup>b</sup> Isolated IGT and isolated IFG were defined by the WHO diagnostic criteria.

**Table 3. Crude and adjusted prevalence of diabetes and prediabetes by province.**

| Province       | Crude, % (95% CI) |                  | Age- and sex-adjusted, % (95% CI) |                  |
|----------------|-------------------|------------------|-----------------------------------|------------------|
|                | Total diabetes    | Prediabetes      | Total diabetes                    | Prediabetes      |
| Jilin          | 13.7 (12.2-15.2)  | 26.3 (24.4-28.1) | 13.4 (8.0-21.7)                   | 24.3 (20.1-29.1) |
| Tianjin        | 13.4 (12.1-14.7)  | 32.1 (30.3-33.9) | 14.4 (11.4-17.9)                  | 31.6 (30.0-33.2) |
| Hebei          | 14.8 (13.5-16.2)  | 42.1 (40.2-43.9) | 14.4 (11.0-18.5)                  | 40.8 (32.6-49.7) |
| Shanxi         | 9.9 (8.7-11.0)    | 34.5 (32.7-36.3) | 10.4 (6.9-15.4)                   | 34.5 (29.1-40.4) |
| Inner Mongolia | 20.9 (19.3-22.4)  | 41.3 (39.4-43.2) | 19.9 (17.6-22.4)                  | 39.8 (24.1-58.1) |
| Liaoning       | 12.8 (11.5-14.0)  | 27.7 (26.0-29.4) | 12.7 (9.3-17.0)                   | 27.2 (26.2-28.1) |
| Beijing        | 17.0 (15.1-18.8)  | 38.2 (35.8-40.5) | 13.6 (13.1-14.1)                  | 31.7 (30.0-33.6) |
| Heilongjiang   | 12.7 (11.4-13.9)  | 40.8 (38.9-42.7) | 12.9 (9.1-18.0)                   | 40.1 (22.0-61.4) |
| Shanghai       | 14.0 (12.7-15.4)  | 32.9 (31.1-34.8) | 13.7 (13.7-13.8)                  | 29.9 (25.7-34.4) |
| Jiangsu        | 11.3 (10.1-12.6)  | 31.3 (29.5-33.2) | 11.5 (11.4-11.7)                  | 30.8 (21.8-41.5) |
| Zhejiang       | 11.8 (10.6-13.1)  | 32.8 (31.0-34.6) | 11.2 (8.7-14.4)                   | 32.7 (25.6-40.7) |
| Anhui          | 9.0 (7.9-10.1)    | 18.8 (17.3-20.3) | 8.5 (5.6-12.6)                    | 17.2 (13.1-22.2) |
| Fujian         | 17.6 (16.1-19.0)  | 48.0 (46.1-49.9) | 17.3 (9.6-29.0)                   | 49.8 (40.0-59.5) |
| Jiangxi        | 12.6 (11.3-13.9)  | 48.3 (46.3-50.2) | 12.1 (8.9-16.1)                   | 46.6 (38.7-54.7) |
| Shandong       | 14.4 (12.8-16.0)  | 36.3 (34.1-38.5) | 13.4 (11.8-15.1)                  | 34.9 (32.7-37.1) |
| Henan          | 11.7 (10.5-13.0)  | 39.8 (38.0-41.7) | 12.0 (10.9-13.2)                  | 40.1 (36.7-43.5) |
| Hubei          | 10.7 (9.5-11.8)   | 43.3 (41.5-45.2) | 10.6 (9.5-11.9)                   | 42.0 (41.5-42.6) |
| Hunan          | 14.2 (12.9-15.6)  | 32.9 (31.0-34.7) | 14.0 (13.8-14.3)                  | 31.5 (25.3-38.6) |
| Guangdong      | 13.5 (12.2-14.8)  | 37.6 (35.8-39.5) | 12.7 (8.4-18.7)                   | 34.9 (31.0-39.1) |

|           |                  |                  |                  |                  |
|-----------|------------------|------------------|------------------|------------------|
| Guangxi   | 12.3 (10.9-13.6) | 34.7 (32.7-36.7) | 11.9 (7.8-17.7)  | 34.8 (32.7-36.9) |
| Hainan    | 18.7 (17.0-20.4) | 40.4 (38.3-42.6) | 17.5 (17.2-17.8) | 35.0 (31.4-38.7) |
| Chongqing | 17.0 (15.5-18.6) | 30.4 (28.5-32.3) | 16.0 (15.3-16.7) | 29.8 (23.7-36.6) |
| Sichuan   | 18.9 (17.1-20.8) | 38.0 (35.8-40.3) | 15.6 (12.1-19.8) | 34.6 (26.9-43.1) |
| Guizhou   | 7.4 (6.4-8.4)    | 30.4 (28.6-32.1) | 6.2 (2.9-12.8)   | 27.6 (17.8-40.1) |
| Yunnan    | 12.6 (11.3-13.9) | 53.5 (51.6-55.4) | 12.4 (10.8-14.2) | 54.5 (46.1-62.6) |
| Tibet     | 6.3 (5.3-7.4)    | 28.8 (26.8-30.7) | 6.5 (6.0-7.0)    | 34.4 (26.2-43.7) |
| Shaanxi   | 15.2 (13.7-16.7) | 31.4 (29.5-33.3) | 15.1 (13.7-16.6) | 32.0 (25.8-38.9) |
| Gansu     | 9.4 (8.3-10.5)   | 36.8 (35.0-38.7) | 9.1 (6.7-12.3)   | 36.0 (33.4-38.6) |
| Qinghai   | 12.2 (10.9-13.4) | 38.9 (37.0-40.7) | 11.8 (8.6-16.0)  | 38.5 (30.3-47.3) |
| Ningxia   | 8.4 (7.5-9.4)    | 38.8 (37.1-40.6) | 8.0 (4.0-15.2)   | 37.9 (37.4-38.4) |
| Xinjiang  | 11.0 (9.8-12.3)  | 22.1 (20.5-23.7) | 11.4 (10.6-12.3) | 21.7 (15.9-28.8) |

---

**Table 4. Overview of the four nationally representative epidemiologic surveys of diabetes in mainland China**

|                         | <b>2007 Survey</b>                                             | <b>2010 Survey</b>                                                                                | <b>2013 Survey</b>                                                                                                                       | <b>2017 Survey</b>                                                                                                                       |
|-------------------------|----------------------------------------------------------------|---------------------------------------------------------------------------------------------------|------------------------------------------------------------------------------------------------------------------------------------------|------------------------------------------------------------------------------------------------------------------------------------------|
| Authors                 | Wenying Yang, et al.                                           | Yu Xu, et al.                                                                                     | Limin Wang, et al.                                                                                                                       | Yongze Li, et al.                                                                                                                        |
| Study objective         | “To estimate the prevalence of diabetes among Chinese adults.” | “To investigate the prevalence of diabetes and glycemic control in the Chinese adult population.” | “To estimate the recent prevalence and to investigate the ethnic variation of diabetes and prediabetes in the Chinese adult population.” | “To assess the current prevalence of diabetes and risk factors in mainland China, as well as the national trend in diabetes prevalence.” |
| Geographical range      | 14 provinces                                                   | 31 provinces                                                                                      | 31 provinces                                                                                                                             | 31 provinces                                                                                                                             |
| Participants            | 46239 participants aged 20 or older                            | 98658 participants aged 18 or older                                                               | 170287 participants aged 18 or older                                                                                                     | 75880 participants aged 18 or older                                                                                                      |
| Study design            | Cross-sectional study                                          | Cross-sectional study                                                                             | Cross-sectional study                                                                                                                    | Cross-sectional study                                                                                                                    |
| Study resource          | The China National Diabetes and Metabolic Disorders Study      | The China Noncommunicable Disease Surveillance 2010                                               | The China Chronic Disease and Risk Factors Surveillance study                                                                            | Thyroid disorders, iodine status and diabetes epidemiological survey                                                                     |
| Sampling design         | Multistage, stratified sampling method                         | Multistage, stratified, probability sampling method                                               | Multistage, stratified sampling method                                                                                                   | Multistage, stratified sampling method                                                                                                   |
| <b>Sampling process</b> |                                                                |                                                                                                   |                                                                                                                                          |                                                                                                                                          |
| Stage 1                 | Select provinces from 6 geographic regions (not random)        | Select 4 subdistricts in urban areas or townships in rural areas from 162 study sites             | Select 8 strata from each province                                                                                                       | Select cities from 31 provinces                                                                                                          |
| Stage 2                 | Select cities and counties                                     | Select 3 neighborhood                                                                             | Select 298 surveillance points                                                                                                           | Randomly select one                                                                                                                      |



|                              |                                                                                                                                          |                                                                                                                                          |                                                                                                                                          |                                                                                                                                          |
|------------------------------|------------------------------------------------------------------------------------------------------------------------------------------|------------------------------------------------------------------------------------------------------------------------------------------|------------------------------------------------------------------------------------------------------------------------------------------|------------------------------------------------------------------------------------------------------------------------------------------|
| Stage 3                      | from the provinces (not random)<br>Randomly select districts from cities and rural townships from counties                               | communities or administrative villages<br>Randomly select 50 households from each neighborhood community or administrative village       | Select 1176 rural townships or urban subdistricts                                                                                        | district/rural town from each city<br>Randomly select two residential communities from each district/rural town                          |
| Stage 4                      | Randomly select street districts from city districts and rural villages from townships                                                   | Randomly select one person from each household                                                                                           | As described, similar to 2010 Survey                                                                                                     | Randomly select participants according to the age and sex composition of each community and an urban/ rural ratio                        |
| Stage 5                      | Stratify the samples according to the sex and age                                                                                        |                                                                                                                                          |                                                                                                                                          |                                                                                                                                          |
| Statistical method           | Weighted to represent the national population aged 20 years or older. Weight coefficients were derived from 2006 China population census | Weighted to represent the national population aged 18 years or older. Weight coefficients were derived from 2010 China population census | Weighted to represent the national population aged 18 years or older. Weight coefficients were derived from 2010 China population census | Weighted to represent the national population aged 18 years or older. Weight coefficients were derived from 2010 China population census |
| Diagnostic criteria          | The 1999 World Health Organization diagnostic criteria                                                                                   | The 2010 American Diabetes Association criteria*                                                                                         | The 2010 American Diabetes Association criteria*                                                                                         | The 2018 American Diabetes Association criteria*                                                                                         |
| Definition of total diabetes | Self-reported diabetes diagnosed by physician, or FPG $\geq$ 7.0 mmol/L, or OGTT2hPG $\geq$ 11.1 mmol/L                                  | Self-reported diabetes diagnosed by physician, or FPG $\geq$ 7.0 mmol/L, or OGTT2hPG $\geq$ 11.1 mmol/L, or HbA1c $\geq$ 6.5%            | Self-reported diabetes diagnosed by physician, or FPG $\geq$ 7.0 mmol/L, or OGTT2hPG $\geq$ 11.1 mmol/L,                                 | Self-reported diabetes diagnosed by physician, or FPG $\geq$ 7.0 mmol/L, or OGTT2hPG $\geq$ 11.1 mmol/L,                                 |

|                                               |                                      |       | or HbA1c $\geq$ 6.5% | or HbA1c $\geq$ 6.5% |
|-----------------------------------------------|--------------------------------------|-------|----------------------|----------------------|
| <b>Main results</b>                           |                                      |       |                      |                      |
| Mean age (years)                              | 44.9                                 | 42.7  | 43.5                 | 42.8                 |
| Mean body mass index, kg/m <sup>2</sup>       | 23.7                                 | 23.7  | 24.0                 | 24.0                 |
| Mean waist circumference, cm                  | 80.7                                 | 80.2  | N/A                  | 83.2                 |
| Mean fasting glucose, mg/dL                   | 94.8                                 | 100.5 | 100.5                | 97.3                 |
| Mean 2-hour glucose, mg/dL                    | 124                                  | 112.3 | 114.2                | 117.1                |
| Mean HbA1c, %                                 | -                                    | 5.8   | 5.4                  | 5.6                  |
| Body mass index, %                            |                                      |       |                      |                      |
| <25 kg/m <sup>2</sup>                         | 63.2                                 | 64.9  | 60.5                 | 63.1                 |
| 25-<30 kg/m <sup>2</sup>                      | 36.8 ( $\geq$ 25 kg/m <sup>2</sup> ) | 29.4  | 32.8                 | 30.6                 |
| $\geq$ 30 kg/m <sup>2</sup>                   |                                      | 5.7   | 6.7                  | 6.3                  |
| Waist circumference, %                        |                                      |       |                      |                      |
| <90 cm in men and <80 cm in women             | 72.9                                 | 63.1  | N/A                  | 55.9                 |
| $\geq$ 90 cm in men and $\geq$ cm in women    | 27.1                                 | 36.9  | N/A                  | 44.1                 |
| Weighted prevalence by the ADA criteria, ** % |                                      |       |                      |                      |
| Total diabetes                                | N/A                                  | 11.6  | 10.9                 | 12.8                 |

|                                                             |      |      |      |      |
|-------------------------------------------------------------|------|------|------|------|
| Diagnosed diabetes                                          | N/A  | 3.5  | 4.0  | 6.0  |
| Undiagnosed diabetes                                        | N/A  | 8.1  | 6.9  | 6.8  |
| Prediabetes                                                 | N/A  | 50.1 | 35.7 | 35.2 |
| Unweighted prevalence of diabetes by the ADA criteria, ** % | N/A  | N/A  | 14.7 | 12.9 |
| Weighted prevalence by the WHO criteria,* ** %              |      |      |      |      |
| Total diabetes                                              | 9.7  | 9.7  | 10.4 | 11.2 |
| Men                                                         | 10.6 | 10.2 | 11.1 | 12.1 |
| Women                                                       | 8.8  | 9.1  | 9.6  | 10.3 |
| Diagnosed diabetes                                          | N/A  | 3.5  | 4.0  | 6.0  |
| Men                                                         | 4.1  | 3.6  | 3.9  | 6.4  |
| Women                                                       | 3.5  | 3.4  | 4.1  | 5.6  |
| Undiagnosed diabetes                                        | N/A  | 6.2  | 6.4  | 5.2  |
| Men                                                         | 6.5  | 6.6  | 7.2  | 5.8  |
| Women                                                       | 5.2  | 5.7  | 5.5  | 4.6  |
| Prediabetes                                                 | 15.5 | N/A  | N/A  | 18.1 |
| Weighted prevalence of awareness of diabetes, %             | N/A  | 30.1 | 36.5 | 43.3 |
| Weighted prevalence                                         | N/A  | 25.8 | 32.2 | 49.0 |

---

of treatment of  
diabetes, %

---

|                     |     |      |      |      |
|---------------------|-----|------|------|------|
| Weighted prevalence | N/A | 39.7 | 49.2 | 49.4 |
|---------------------|-----|------|------|------|

---

of control of  
diabetes, %

\* This study also provided the results defined by 1999 World Health Organization diagnostic criteria. \*\* Diabetes was diagnosed according to the ADA criteria. \*\*\* Diabetes was diagnosed according to the WHO criteria. Data sources: For 2007 national survey PMID: 20335585. For 2010 national survey PMID: 24002281. For 2013 national survey PMID: 28655017.

**Table 5. Prevalence of total diabetes, prediabetes diagnosed by the ADA criteria and obesity among the adults living in China stratified by age group according to the 2013 and 2017 nationwide surveys.**

| Age group         | Prevalence of total diabetes, % (95% CI) |                  | Prevalence of prediabetes, % (95% CI) |                  | Prevalence of obesity, % (95% CI) |               |
|-------------------|------------------------------------------|------------------|---------------------------------------|------------------|-----------------------------------|---------------|
|                   | 2013                                     | 2017             | 2013                                  | 2017             | 2013                              | 2017          |
| <40 Years old     | 5.9 (5.1-6.6)                            | 3.9 (3.3-4.7)    | 28.8 (26.8-30.9)                      | 24.5 (22.4-26.7) | 6.0 (5.5-6.5)                     | 5.7 (5.1-6.3) |
| 40-59 Years old   | 12.9 (12.3-13.5)                         | 15.8 (14.8-16.9) | 39.5 (37.8-41.2)                      | 42.9 (41.0-44.9) | 7.3 (6.9-7.6)                     | 7.2 (6.7-7.9) |
| 60 Years or older | 20.2 (19.1-21.2)                         | 30.2 (27.9-32.6) | 45.8 (44.3-47.2)                      | 47.7 (45.0-50.5) | 5.5 (5.0-6.0)                     | 5.6 (5.0-6.2) |

\* Data sources: For 2013 national survey PMID: 28655017.

## **Appendix 1. Additional information on anthropometric and clinical methods and quality control**

Bodyweight and height were measured according to the 3rd edition of Cardiovascular Survey Methods from the World Health Organization. Waist circumference was measured on standing participants midway between the lower edge of the costal arch and the upper edge of the iliac crest. Blood specimens for the glucose test were collected using vacuum blood-collection tubes containing anticoagulant sodium fluoride. A stringent quality assurance and quality control program was implemented to ensure the validity and reliability of the study data. All investigators and research staff underwent a training session twice on the use of standardized protocols and instruments for data collection. A standardized investigation protocol for each province ensured consistency. All laboratory equipment was calibrated and blinded duplicate samples were used. Regular maintenance was performed every day during the period of measurement. We performed quality controls three times (before, during and after) for each batch, and three samples were randomly selected from high, middle and low values to re-analysis after each procedure. The precision of the Bio-Rad VARIANT II Hemoglobin Analyzer was evaluated according to the Clinical & Laboratory Standards Institute guideline. All data were double entered in EpiData 3.1 and then compared and corrected for errors. The center sent supervisory personnel to each survey site for quality control.
